# Supplementary material for: Staphylococcus aureus in the Processing Environment of Cured Meat Products
Source: MDPI journal article supplement (doi:10.3390/foods12112161), 2023-05-26
Supplement: s1 [file s1]

**Table S1.** List of primers used in this study

|                    | Gene        | Primer name | Primer sequence 5'-3'         | PCR product (bp) | T <sub>a</sub> | Reference  |
|--------------------|-------------|-------------|-------------------------------|------------------|----------------|------------|
| <i>S. aureus</i>   | 16S         | 16S1        | GTGCCAGCAGCCGCGGTAA           | 886              |                | [60]       |
|                    |             | 16S2        | AGACCCGGGAACGTATTCAC          |                  |                |            |
|                    | <i>mecA</i> | mecA1       | GGGATCATAGCGTCATTATTC         | 527              |                | [60]       |
|                    |             | mecA2       | AACGATTGTGACACGATAGCC         |                  |                |            |
| Enterotoxins       | <i>nuc</i>  | nuc1        | TCAGCAAATGCATCACAAACAG        | 255              |                | [60]       |
|                    |             | nuc2        | CGTAAATGCACTTGCTTCAGG         |                  |                |            |
|                    | <i>sea</i>  | sea3        | CCTTTGGAAACGGTAAAAACG         | 127              |                | [61]       |
|                    |             | sea4        | TCTGAACCTTCCCATCAAAAAC        |                  |                |            |
|                    | <i>seb</i>  | sebF        | AAATACGTAGATGTGTTTGGAGC       | 374              | 58°C           | This study |
|                    |             | sebR        | GGTGCAGGCATCATGTCATAC         |                  |                |            |
|                    | <i>sec</i>  | sec3        | CTCAAGAACTAGACATAAAAGCTAGG    | 271              |                | [61]       |
|                    |             | sec4        | TCAAAATCGGATTAACATTATCC       |                  |                |            |
|                    | <i>sed</i>  | sed3        | CTAGTTTGGTAATATCTCCTTTAAACG   | 319              |                | [61]       |
|                    |             | sed4        | TTAATGCTATATCTTATAGGGTAAACATC |                  |                |            |
|                    | <i>see</i>  | seeF        | TACCAATTAACCTTGTGGATAGAC      | 171              |                | [62]       |
|                    |             | seeR        | CTCTTTGCACCTTACCGC            |                  |                |            |
|                    | <i>seg</i>  | seg1        | TGCTATCGACACACTACAACC         | 704              |                | [63]       |
|                    |             | seg2        | CCAGATTCAAATGCAGAACC          |                  |                |            |
|                    | <i>seh</i>  | seh-1       | GTCTATATGGAGGTACAACACT        | 213              |                | [64]       |
|                    |             | seh-2       | GACCTTTACTTATTTTCGCTGTC       |                  |                |            |
|                    | <i>sei</i>  | sei1        | GACAACAAAACGTGTCGAAACTG       | 630              |                | [63]       |
|                    |             | sei2        | CCATATTCTTTGCCTTTACCAG        |                  |                |            |
|                    | <i>sej</i>  | sejF        | GCATGATAAAAAGAATCAGCCAGC      | 1338             | 58°C           | This study |
|                    |             | sejR        | GCATATACGGGGGCGTTAC           |                  |                |            |
| <i>selk-selq</i> * |             | QF          | TAGCATATGCTGATGTAGGGGT        | 1200             | 58°C           | This study |
|                    |             | KR          | CTTCTCCTTTTTTAGTGCCGTTATG     |                  |                |            |
| <i>ser</i> **      |             | serF        | CCAGATCCAAGACCTGGAGAA         | 1123             | 58°C           | This study |
|                    |             | serR        | CATCAGAAGCTGTTGTTCCGCT        |                  |                |            |

|                             |             |         |                                 |         |      |            |
|-----------------------------|-------------|---------|---------------------------------|---------|------|------------|
| Antimicrobials              | <i>blaZ</i> | blaZ1   | ATGTAATTCAAACAGTTCACATGCC       | 701     | 57°C | This study |
|                             |             | blaZ2   | ATAGGTTCAGATTGGCCCTTAGG         |         |      |            |
| Biofilm                     | <i>icaA</i> | icaAF   | CCTAACTAACGAAAGGTAG             | 1315 bp |      | [65]       |
|                             |             | icaAR   | AGATATAGCGATAAGTGC              |         |      |            |
| Virulence                   | <i>tst</i>  | TST1    | TTCACTATTTGTAAAAGTGTGACACCCACT  | 180 bp  |      | [66]       |
|                             |             | TST2    | TACTAATGAATTTTTTATCGTAAGCCCTT   |         |      |            |
|                             | PVL         | Pv1     | ATCATTAGGTAAAATGTCTGGACATGATCCA | 433 bp  |      | [46]       |
|                             |             | Pv2     | GCATCAASTGTATTGGATAGCAAAAGC     |         |      |            |
| Enterotoxin<br>gene cluster | <i>egc</i>  | tSerF   | AAAGTGTGTAGGCGCCAC              | 755 bp  | 56°C | This study |
|                             |             | selOR   | CATTATCCTTATACACAGCTACTCC       |         |      |            |
|                             |             | selOF   | TGCAATATGTAGTGTAACAATG          | 1380 bp | 52°C | This study |
|                             |             | selmvR3 | CATTAAACCCAAAGATTAATAGGAATA     |         |      |            |
|                             |             | selmvF  | GCTGAATTTAAGAACGTTGA            | 1064 bp | 50°C | This study |
|                             |             | seiR    | TGTTATTATGACCATATATATTGTATTC    |         |      |            |
|                             |             | seiF1   | GCCACTTTATCAGGACAATAC           | 1736 bp | 51°C | This study |
|                             |             | selnR2  | GTAAAGCCTACACATTTATTTCC         |         |      |            |
|                             |             | 2427F†  | AGGACAATACTTAAATTCTGCT          | 1338 bp | 53°C | This study |
|                             |             | 3758R†  | TCTCCCTCAATTTTTTGGT             |         |      |            |
|                             |             | 3082F†  | GAATTCCTGGTCTAATGGAT            | 1153 bp | 53°C | This study |
|                             |             | 4215R†  | TCTCTTCATCTAATTGATTCCA          |         |      |            |
|                             |             | selnF   | CAGATTTAGCAAATCAATTTAAAG        | 1311 bp | 55°C | This study |
|                             |             | segR3   | GTCTTGCTTTGTAATCTAGTTC          |         |      |            |
|                             |             | segF    | CTCCACCTGTTGAAGGAAGAG           |         |      |            |
|                             |             | HPR1*** | TATCATTTCCACTGGAGAATCATG        | 1338 bp | 56°C | This study |
|                             |             | HPR2*** | GTGATATCAAACCAAACAGACC          | 870 bp  | 56°C | This study |

\*Amplifies 1200 bp comprising part of both genes (*selk* and *selq*).

\*\* *ser* gene is located along with *sej*, these primers amplify a fragment of both genes.

† Amplifies a fragment of *egc* cluster reluctant in several strains with primers seiF-selnR2.

\*\*\* HPR1 or HPR2 were used as reverse primers with segF depending on the strain comprising part of the mentioned genes.
